# Supplementary material for: Regulation of age-related structural integrity in neurons by protein with tau-like repeats (PTL-1) is cell autonomous
Source: PubMed Central journal article supplement — Sci Rep. 2014 Jun 5;4:5185. doi: 10.1038/srep05185 (PMC4046136; doi:10.1038/srep05185), 2014-06-05
Supplement: srep05185-s1.pdf [file srep05185-s1.pdf]

**Title:** Regulation of age-related structural integrity in neurons by protein with tau-like repeats (PTL-1) is cell autonomous

**Authors:** Yee Lian Chew<sup>1†</sup>, Xiaochen Fan<sup>1†</sup>, Jürgen Götz<sup>2</sup>, Hannah R Nicholas<sup>1\*</sup>

1- School of Molecular Bioscience, University of Sydney, Australia

2- Centre for Ageing Dementia Research (CADR) at the Queensland Brain Institute (QBI), University of Queensland, Australia

† These authors contributed equally to the manuscript

\* Corresponding author

## **Legends**

### **Supplementary Figure S1**

**Pan-neuronal but not TRN-specific re-expression of PTL-1 rescues the short-lived phenotype of the *ptl-1(ok621)* null mutant.** The survival curves shown were obtained independently from data shown in **Figure 1bii** and **cii**. Lifespan assays for a) pan-neuronal transgenic worms and b) TRN-transgenic worms. Results of statistical analysis are indicated by p-values underneath each graph. Survival curves for control wild-type and *ptl-1(ok621)* animals in both graphs were obtained in the same experiment. For all strains, n = 120 at day 0. Details of p-values are shown in **Supplementary Table S2**.

### **Supplementary Figure S2**

**Neuronal aging phenotypes rescued by pan-neuronal or TRN-specific Tg lines at 20 °C also rescue at 25 °C in TRNs and GABAergic neurons.** The TRNs were visualised using the *Pmec-*

*4::gfp* (*zdis5*) reporter and the GABAergic neurons using the *Punc-47::gfp* (*oxIs12*) reporter. The presence of the *ptl-1(ok621)* mutation in the genetic background of each transgenic line is indicated by the addition of “*ptl-1(ok621)*” in the strain name. a) Neuron imaging assay conducted for pan-neuronal transgenic worms (“Pan-neuronal Tg”) showing (i) TRN cell body branching, (ii) TRN axon blebbing and (iii) GABAergic commissure branching. b) Neuron imaging assay conducted for TRN-specific transgenic worms (“TRN Tg”) showing (i) TRN cell body branching, (ii) TRN axon blebbing and (iii) GABAergic commissure branching. Data for wild-type and *ptl-1(ok621)* animals in TRN graphs were obtained in the same experiment, similarly data for wild-type and *ptl-1(ok621)* animals in GABAergic neuron graphs were obtained from the same experiment. n for each time-point is indicated under the graphs. The chi-squared statistical test was used to determine statistical significance. P-value is indicated by ns = not significant, \* $<0.05$ . Details of p-values are shown in **Supplementary Table S2**. Experiments were conducted twice independently, and the representative data shown are from one experiment.

### Supplementary Figure S3

**Knockdown of *ptl-1* in a TRN *SID-1* transgenic animal expressing PTL-1::GFP results in loss of fluorescence in TRNs only.** The strain used for imaging expresses a PTL-1::GFP fusion protein and TRN-specific *SID-1* in a *sid-1* mutant background. Micrographs are shown for empty vector (EV) RNAi controls (a,c,e) and for *ptl-1* RNAi treatment (b,d,f) with PTL-1::GFP shown on the left and phase images shown on the right. For all micrographs showing fluorescence, boxed regions (solid lines) are shown as a magnified inset that is bordered by dashed lines. a) The ALM neuron in the EV control is clearly visible at a 200 ms exposure time, indicated by the

white arrow. b) The approximate location of the ALM neuron in an animal exposed to *ptl-1* RNAi treatment shows no fluorescence visible at 200 ms. (c,d) At a longer exposure time (5000 ms), the ALM neuron is clearly seen in the EV control, indicated by the white arrow (c) and as a faint signal in the *ptl-1* RNAi-treated animal (d). (e,f) The PLM neuron cell body is clearly visible in the EV control, indicated by the white arrow (e) but not with *ptl-1* RNAi treatment (f) at a 200 ms exposure time. Fourth larval stage/first day adult animals were imaged after being fed RNAi bacteria for two generations at 20 °C.

### Supplementary Table S1

**Tables indicate the exact p-value (to two decimal places) of statistical testing conducted in this investigation shown in Figures 1-4.** Neuronal imaging experiments both for transgenic lines and knockdown by RNAi treatment were analysed using Pearson's chi-squared test (Microsoft Excel). Survival curves were analysed with GraphPad Prism 6 (GraphPad Software Inc.) using log-rank and Wilcoxon tests. For more detail on statistical methods, please see the **Materials and Methods** section.

### Supplementary Table S2

**Tables indicate the exact p-value (to two decimal places) of statistical testing conducted for lifespan and neuronal imaging experiments shown in Supplementary Figures S1 and S2.** Neuronal imaging experiments for transgenic lines were analysed using Pearson's chi-squared test (Microsoft Excel). Survival curves were analysed with GraphPad Prism 6 (GraphPad Software Inc.) using log-rank and Wilcoxon tests. For more detail on statistical methods, please see the **Materials and Methods** section.

Lifespan experiments for pan-neuronal and TRN Tg lines - independent experiment #2

**a** Lifespan assay: Pan-neuronal Tg

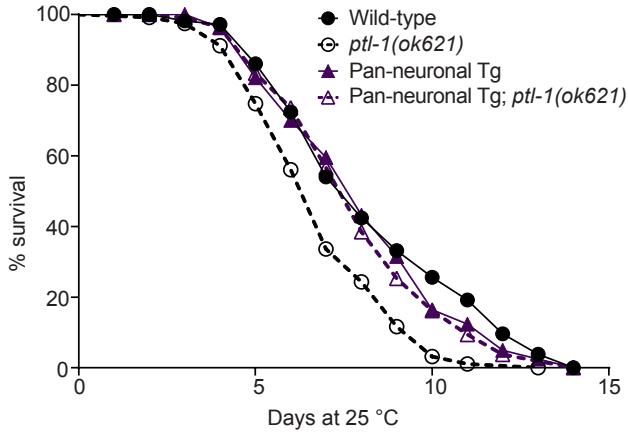

|                                                          | Log rank test   | Gehan-Breslow-Wilcoxon test |
|----------------------------------------------------------|-----------------|-----------------------------|
| Wild-type vs. <i>ptl-1(ok621)</i>                        | <0.05           | <0.05                       |
| Wild-type vs. "Pan-neuronal Tg"                          | Not significant | Not significant             |
| Wild-type vs. "Pan-neuronal Tg;<br><i>ptl-1(ok621)</i> " | Not significant | Not significant             |

**b** Lifespan assay: TRN Tg

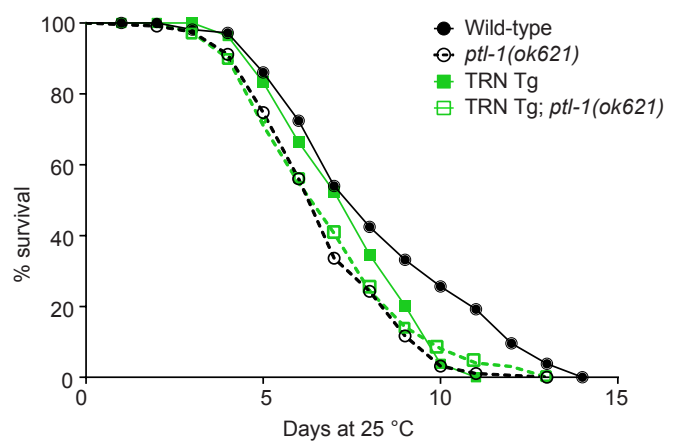

|                                                 | Log rank test | Gehan-Breslow-Wilcoxon test |
|-------------------------------------------------|---------------|-----------------------------|
| Wild-type vs. <i>ptl-1(ok621)</i>               | <0.05         | <0.05                       |
| Wild-type vs. "TRN Tg"                          | <0.05         | Not significant             |
| Wild-type vs. "TRN Tg;<br><i>ptl-1(ok621)</i> " | <0.05         | <0.05                       |

Neuron imaging experiments at 25 °C

Pan-neuronal Tg

TRN-specific Tg

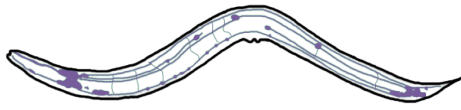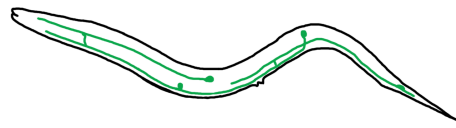

a i TRN cell body branching

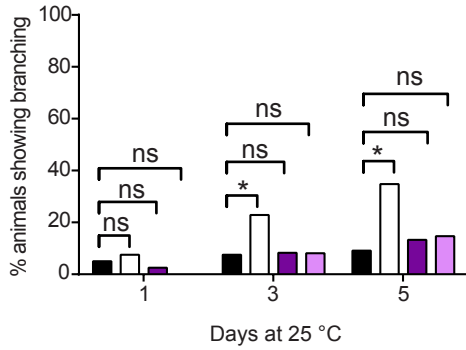

b i TRN cell body branching

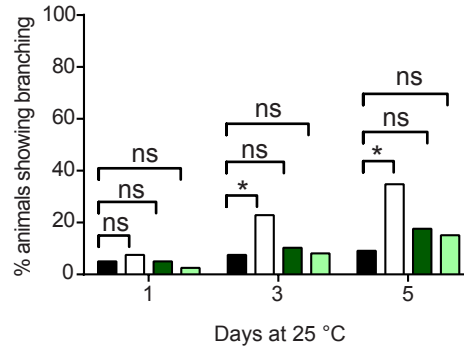

ii TRN axon blebbing

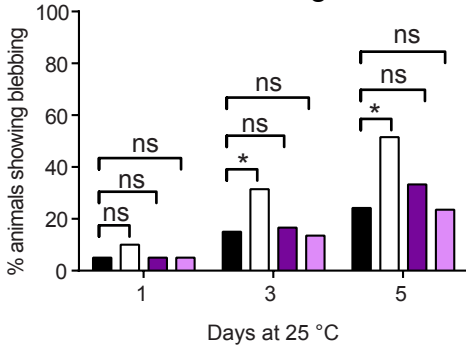

ii TRN axon blebbing

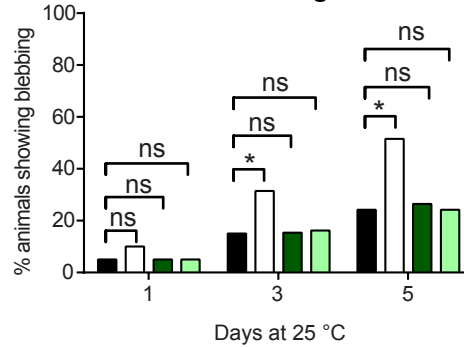

| n                                    | D1 | D3 | D5 |
|--------------------------------------|----|----|----|
| Wild-type                            | 40 | 40 | 33 |
| <i>ptl-1(ok621)</i>                  | 40 | 35 | 23 |
| Pan-neuronal Tg                      | 40 | 36 | 30 |
| Pan-neuronal Tg; <i>ptl-1(ok621)</i> | 40 | 37 | 34 |

| n                           | D1 | D3 | D5 |
|-----------------------------|----|----|----|
| Wild-type                   | 40 | 40 | 33 |
| <i>ptl-1(ok621)</i>         | 40 | 35 | 23 |
| TRN Tg                      | 40 | 39 | 34 |
| TRN Tg; <i>ptl-1(ok621)</i> | 40 | 37 | 33 |

iii GABAergic neuron branching

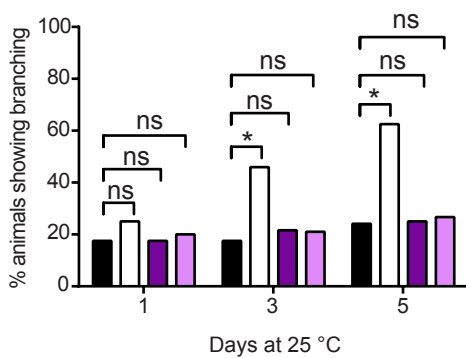

iii GABAergic neuron branching

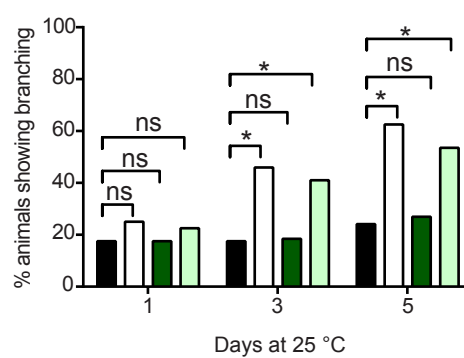

| n                                    | D1 | D3 | D5 |
|--------------------------------------|----|----|----|
| Wild-type                            | 40 | 40 | 29 |
| <i>ptl-1(ok621)</i>                  | 40 | 37 | 16 |
| Pan-neuronal Tg                      | 40 | 37 | 28 |
| Pan-neuronal Tg; <i>ptl-1(ok621)</i> | 40 | 38 | 30 |

| n                           | D1 | D3 | D5 |
|-----------------------------|----|----|----|
| Wild-type                   | 40 | 40 | 33 |
| <i>ptl-1(ok621)</i>         | 40 | 35 | 23 |
| TRN Tg                      | 40 | 38 | 26 |
| TRN Tg; <i>ptl-1(ok621)</i> | 40 | 39 | 28 |

TRN-specific RNAi knockdown of *ptl-1* in a PTL-1::GFP transgenic line

EV RNAi

*ptl-1* RNAi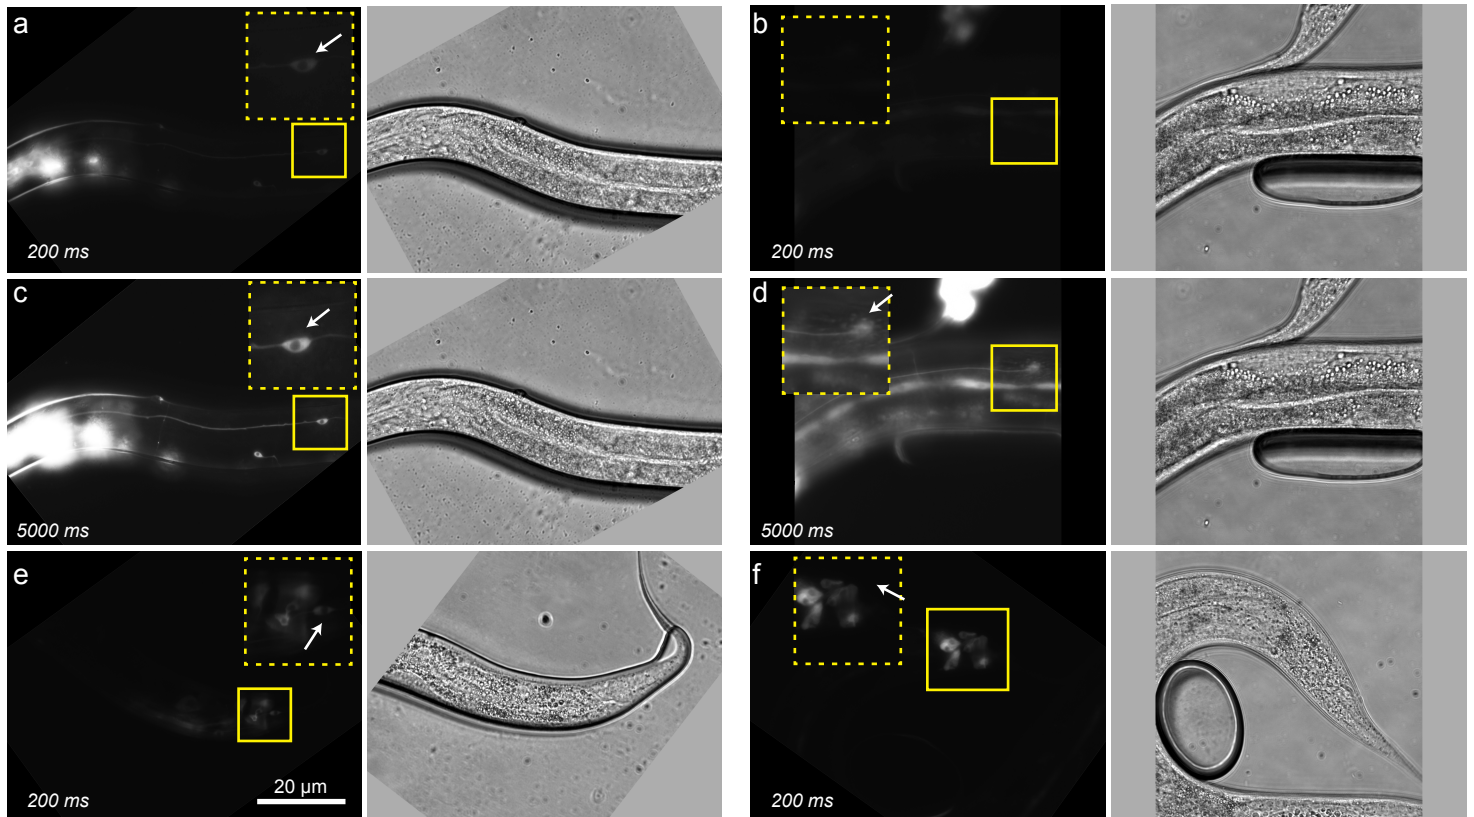

**Title:** Regulation of age-related structural integrity in neurons by protein with tau-like repeats (PTL-1) is cell autonomous  
**Authors:** Yee Lian Chew<sup>1†</sup>, Xiaochen Fan<sup>1†</sup>, Jürgen Götz<sup>2</sup>, Hannah R Nicholas<sup>1\*</sup>

### Supplementary Table S1

#### Neuron imaging assay using Pan-neuronal Tg and TRN Tg lines

Table indicates p-values for chi-squared statistical test between wild-type (set as expected value) and other strains tested

#### Anterior TRNs - cell body branching

| Day | <i>ptl-1(ok621)</i> | Pan-neuronal Tg | Pan-neuronal Tg;<br><i>ptl-1(ok621)</i> | TRN Tg | TRN Tg; <i>ptl-1(ok621)</i> |
|-----|---------------------|-----------------|-----------------------------------------|--------|-----------------------------|
| 1   | 0.55                | 0.55            | 0.23                                    | 0.55   | 0.55                        |
| 5   | 0.01                | 0.34            | 0.16                                    | 0.16   | 0.48                        |
| 7   | 2.69E-05            | 0.72            | 0.26                                    | 0.51   | 0.28                        |
| 9   | 2.63E-04            | 0.67            | 0.44                                    | 0.50   | 0.21                        |

#### Anterior TRNs - axon blebbing

| Day | <i>ptl-1(ok621)</i>                    | Pan-neuronal Tg | Pan-neuronal Tg;<br><i>ptl-1(ok621)</i> | TRN Tg | TRN Tg; <i>ptl-1(ok621)</i> |
|-----|----------------------------------------|-----------------|-----------------------------------------|--------|-----------------------------|
| 1   | not calculated - wild-type value is 0% |                 |                                         |        |                             |
| 5   | not calculated - wild-type value is 0% |                 |                                         |        |                             |
| 7   | 1.37E-07                               | 0.74            | 0.21                                    | 0.44   | 0.01                        |
| 9   | 1.92E-09                               | 0.05            | 0.05                                    | 0.11   | 0.09                        |

#### GABAergic neurons - branching

| Day | <i>ptl-1(ok621)</i> | Pan-neuronal Tg | Pan-neuronal Tg;<br><i>ptl-1(ok621)</i> | TRN Tg | TRN Tg; <i>ptl-1(ok621)</i> |
|-----|---------------------|-----------------|-----------------------------------------|--------|-----------------------------|
| 1   | 0.34                | 0.63            | 1.00                                    | 0.63   | 1.00                        |
| 5   | 5.90E-07            | 0.10            | 0.26                                    | 0.11   | 8.46E-07                    |
| 7   | 1.72E-04            | 0.44            | 0.51                                    | 0.85   | 2.88E-04                    |
| 9   | 7.41E-07            | 0.57            | 0.57                                    | 0.36   | 3.85E-06                    |

#### Lifespan assay

p-values for survival curves using log-rank or Gehan-Breslow-Wilcoxon (Wilcoxon) comparisons between wild-type and other strains tested

| Test     | <i>ptl-1(ok621)</i> | Pan-neuronal Tg | Pan-neuronal Tg;<br><i>ptl-1(ok621)</i> | TRN Tg | TRN Tg; <i>ptl-1(ok621)</i> |
|----------|---------------------|-----------------|-----------------------------------------|--------|-----------------------------|
| Log-rank | < 0.0001            | 0.28            | 0.28                                    | 0.01   | 1.00E-04                    |
| Wilcoxon | 3.00E-04            | 0.53            | 0.47                                    | 0.15   | 2.10E-03                    |

#### Neuron imaging assay using *ptl-1* RNAi

p-values for chi-squared statistical test between empty vector (EV) treatment (set as expected value) and *ptl-1* treatment for each genotype

#### Anterior TRNs - cell body branching

| Day | <i>zDIs5</i> | <i>sid-1(qt2)</i> ; TRN SID-1 |
|-----|--------------|-------------------------------|
| 1   | 0.54         | 0.65                          |
| 3   | 1.00         | 0.41                          |
| 5   | 0.69         | 0.01                          |
| 7   | 0.70         | 0.01                          |

#### Anterior TRNs - axon blebbing

| Day | <i>zDIs5</i> | <i>sid-1(qt2)</i> ; TRN SID-1 |
|-----|--------------|-------------------------------|
| 1   | n.c.         | 1.00                          |
| 3   | 1.00         | 0.22                          |
| 5   | 0.46         | 0.00                          |
| 7   | 1.00         | 0.01                          |

n.c. = not calculated - wild-type value is 0%

#### Anterior TRNs - axon branching

| Day | <i>zDIs5</i> | <i>sid-1(qt2)</i> ; TRN SID-1 |
|-----|--------------|-------------------------------|
| 1   | 0.31         | 0.54                          |
| 3   | n.c.         | 0.00                          |
| 5   | n.c.         | 0.00                          |
| 7   | n.c.         | 0.11                          |

n.c. = not calculated - wild-type value is 0%

#### GABAergic neurons - branching

| Day | <i>zDIs5</i> | <i>sid-1(qt2)</i> ; TRN SID-1 |
|-----|--------------|-------------------------------|
| 1   | 1.00         | 1.00                          |
| 3   | 0.62         | 1.00                          |
| 5   | 1.00         | 0.39                          |
| 7   | 0.45         | 0.82                          |

n.c. = not calculated - wild-type value is 0%

**Title:** Regulation of age-related structural integrity in neurons by protein with tau-like repeats (PTL-1) is cell autonomous

**Authors:** Yee Lian Chew<sup>1†</sup>, Xiaochen Fan<sup>1†</sup>, Jürgen Götz<sup>2</sup>, Hannah R Nicholas<sup>1\*</sup>

## Supplementary Table S2

### Lifespan assay

p-values for survival curves using log-rank or Gehan-Breslow-Wilcoxon (Wilcoxon) comparisons between wild-type and other strains tested

| Test     | <i>ptl-1(ok621)</i> | Pan-neuronal Tg | Pan-neuronal Tg; <i>ptl-1(ok621)</i> | TRN Tg | TRN Tg; <i>ptl-1(ok621)</i> |
|----------|---------------------|-----------------|--------------------------------------|--------|-----------------------------|
| Log-rank | < 0.0001            | 0.51            | 0.31                                 | 0.00   | 4.00E-04                    |
| Wilcoxon | 4.00E-04            | 0.76            | 0.63                                 | 0.12   | 1.00E-03                    |

### Neuron imaging assay using Pan-neuronal Tg and TRN Tg lines

Table indicates p-values for chi-squared statistical test between wild-type (set as expected value) and other strains tested

#### Anterior TRNs - cell body branching

| Day | <i>ptl-1(ok621)</i> | Pan-neuronal Tg | Pan-neuronal Tg; <i>ptl-1(ok621)</i> | TRN Tg | TRN Tg; <i>ptl-1(ok621)</i> |
|-----|---------------------|-----------------|--------------------------------------|--------|-----------------------------|
| 1   | 0.04                | 1.00            | 1.00                                 | 1.00   | 1.00                        |
| 3   | 0.00                | 0.52            | 0.24                                 | 0.87   | 0.63                        |
| 5   | 9.94E-03            | 0.43            | 0.48                                 | 0.48   | 0.47                        |

#### Anterior TRNs - axon blebbing

| Day | <i>ptl-1(ok621)</i> | Pan-neuronal Tg | Pan-neuronal Tg; <i>ptl-1(ok621)</i> | TRN Tg | TRN Tg; <i>ptl-1(ok621)</i> |
|-----|---------------------|-----------------|--------------------------------------|--------|-----------------------------|
| 1   | 0.15                | 1.00            | 1.00                                 | 1.00   | 1.00                        |
| 3   | 0.01                | 0.49            | 0.59                                 | 0.86   | 0.61                        |
| 5   | 0.00                | 0.22            | 0.84                                 | 0.72   | 1.00                        |

#### GABAergic neurons - branching

| Day | <i>ptl-1(ok621)</i> | Pan-neuronal Tg | Pan-neuronal Tg; <i>ptl-1(ok621)</i> | TRN Tg | TRN Tg; <i>ptl-1(ok621)</i> |
|-----|---------------------|-----------------|--------------------------------------|--------|-----------------------------|
| 1   | 0.21                | 1.00            | 0.68                                 | 1.00   | 0.41                        |
| 3   | 1.06E-05            | 0.43            | 0.52                                 | 0.73   | 1.33E-04                    |
| 5   | 3.25E-04            | 0.83            | 0.71                                 | 0.52   | 3.42E-04                    |
